# Supplementary material
Source: MDPI journal article supplement (https://www.mdpi.com/2304-6740/6/3/72)

# checkCIF/PLATON report

You have not supplied any structure factors. As a result the full set of tests cannot be run.

THIS REPORT IS FOR GUIDANCE ONLY. IF USED AS PART OF A REVIEW PROCEDURE FOR PUBLICATION, IT SHOULD NOT REPLACE THE EXPERTISE OF AN EXPERIENCED CRYSTALLOGRAPHIC REFEREE.

No syntax errors found.      CIF dictionary      Interpreting this report

## Datablock: mo\_d8v3317\_0m

---

Bond precision:    C-C = 0.0116 A                      Wavelength=0.71073

Cell:                      a=12.386(2)              b=15.853(2)              c=20.547(2)  
                            alpha=90              beta=90              gamma=90  
Temperature:              122 K

|                | Calculated            | Reported                           |
|----------------|-----------------------|------------------------------------|
| Volume         | 4034.5(9)             | 4034.5(9)                          |
| Space group    | P 21 21 21            | P 21 21 21                         |
| Hall group     | P 2ac 2ab             | P 2ac 2ab                          |
| Moiety formula | C30 H24 F18 Ga Gd O12 | C30 H24 F16.5 Ga Gd O12,<br>1.5(F) |
| Sum formula    | C30 H24 F18 Ga Gd O12 | C30 H24 F18 Ga Gd O12              |
| Mr             | 1145.46               | 1145.46                            |
| Dx,g cm-3      | 1.886                 | 1.886                              |
| Z              | 4                     | 4                                  |
| Mu (mm-1)      | 2.437                 | 2.437                              |
| F000           | 2228.0                | 2228.0                             |
| F000'          | 2230.11               |                                    |
| h,k,lmax       | 16,20,27              | 16,20,27                           |
| Nref           | 9738[ 5384]           | 9691                               |
| Tmin,Tmax      | 0.726,0.789           | 0.516,0.746                        |
| Tmin'          | 0.628                 |                                    |

Correction method= # Reported T Limits: Tmin=0.516 Tmax=0.746  
AbsCorr = MULTI-SCAN

Data completeness= 1.80/1.00                      Theta(max)= 27.981

R(reflections)= 0.0376( 8857)                      wR2(reflections)= 0.0967( 9691)

S = 1.042                      Npar= 675

---

The following ALERTS were generated. Each ALERT has the format

**test-name\_ALERT\_alert-type\_alert-level.**

Click on the hyperlinks for more details of the test.

### ● Alert level C

|                   |                                                       |         |        |
|-------------------|-------------------------------------------------------|---------|--------|
| PLAT090_ALERT_3_C | Poor Data / Parameter Ratio (Zmax > 18) .....         | 7.98    | Note   |
| PLAT094_ALERT_2_C | Ratio of Maximum / Minimum Residual Density ....      | 2.24    | Report |
| PLAT215_ALERT_3_C | Disordered F3#            has ADP max/min Ratio ..... | 4.0     | Note   |
| PLAT215_ALERT_3_C | Disordered F4#            has ADP max/min Ratio ..... | 3.5     | Note   |
| PLAT215_ALERT_3_C | Disordered F8#            has ADP max/min Ratio ..... | 3.2     | Note   |
| PLAT220_ALERT_2_C | Non-Solvent   Resd 1   C   Ueq(max)/Ueq(min) Range    | 4.5     | Ratio  |
| PLAT234_ALERT_4_C | Large Hirshfeld Difference F10            --C7BA      | 0.22    | Ang.   |
| PLAT234_ALERT_4_C | Large Hirshfeld Difference F6AA            --C5BA     | 0.20    | Ang.   |
| PLAT241_ALERT_2_C | High    'MainMol' Ueq as Compared to Neighbors of     | F6AA    | Check  |
| PLAT342_ALERT_3_C | Low Bond Precision on   C-C Bonds .....               | 0.01158 | Ang.   |

### ● Alert level G

|                   |                                                      |       |              |
|-------------------|------------------------------------------------------|-------|--------------|
| PLAT002_ALERT_2_G | Number of Distance or Angle Restraints on AtSite     | 31    | Note         |
| PLAT003_ALERT_2_G | Number of Uiso or Uij Restrained non-H Atoms ...     | 8     | Report       |
| PLAT012_ALERT_1_G | No            _shelx_res_checksum Found in CIF ..... |       | Please Check |
| PLAT042_ALERT_1_G | Calc. and Reported MoietyFormula Strings Differ      |       | Please Check |
| PLAT083_ALERT_2_G | SHELXL Second Parameter in WGHT   Unusually Large    | 12.76 | Why ?        |
| PLAT153_ALERT_1_G | The s.u.'s on the Cell Axes   are Equal ..(Note)     | 0.002 | Ang.         |
| PLAT172_ALERT_4_G | The CIF-Embedded .res File Contains DFIX Records     | 2     | Report       |
| PLAT176_ALERT_4_G | The CIF-Embedded .res File Contains SADI Records     | 3     | Report       |
| PLAT186_ALERT_4_G | The CIF-Embedded .res File Contains ISOR Records     | 4     | Report       |
| PLAT242_ALERT_2_G | Low    'MainMol' Ueq as Compared to Neighbors of     | C5    | Check        |
| PLAT242_ALERT_2_G | Low    'MainMol' Ueq as Compared to Neighbors of     | C6AA  | Check        |
| PLAT242_ALERT_2_G | Low    'MainMol' Ueq as Compared to Neighbors of     | C5AA  | Check        |
| PLAT242_ALERT_2_G | Low    'MainMol' Ueq as Compared to Neighbors of     | C7AA  | Check        |
| PLAT242_ALERT_2_G | Low    'MainMol' Ueq as Compared to Neighbors of     | C1BA  | Check        |
| PLAT242_ALERT_2_G | Low    'MainMol' Ueq as Compared to Neighbors of     | C14   | Check        |
| PLAT300_ALERT_4_G | Atom Site Occupancy of C3            Constrained at  | 0.75  | Check        |
| PLAT300_ALERT_4_G | Atom Site Occupancy of C3AA          Constrained at  | 0.75  | Check        |
| PLAT300_ALERT_4_G | Atom Site Occupancy of C4AA          Constrained at  | 0.75  | Check        |
| PLAT300_ALERT_4_G | Atom Site Occupancy of C9            Constrained at  | 0.75  | Check        |
| PLAT300_ALERT_4_G | Atom Site Occupancy of C10           Constrained at  | 0.75  | Check        |
| PLAT300_ALERT_4_G | Atom Site Occupancy of C0BA          Constrained at  | 0.75  | Check        |
| PLAT300_ALERT_4_G | Atom Site Occupancy of C9AA          Constrained at  | 0.75  | Check        |
| PLAT300_ALERT_4_G | Atom Site Occupancy of C4BA          Constrained at  | 0.75  | Check        |
| PLAT300_ALERT_4_G | Atom Site Occupancy of C17           Constrained at  | 0.75  | Check        |
| PLAT300_ALERT_4_G | Atom Site Occupancy of C6            Constrained at  | 0.25  | Check        |
| PLAT300_ALERT_4_G | Atom Site Occupancy of C8            Constrained at  | 0.25  | Check        |
| PLAT300_ALERT_4_G | Atom Site Occupancy of C11           Constrained at  | 0.25  | Check        |
| PLAT300_ALERT_4_G | Atom Site Occupancy of C9BA          Constrained at  | 0.25  | Check        |
| PLAT300_ALERT_4_G | Atom Site Occupancy of C5BA          Constrained at  | 0.25  | Check        |
| PLAT300_ALERT_4_G | Atom Site Occupancy of C6BA          Constrained at  | 0.25  | Check        |
| PLAT300_ALERT_4_G | Atom Site Occupancy of C8BA          Constrained at  | 0.25  | Check        |
| PLAT300_ALERT_4_G | Atom Site Occupancy of C0CA          Constrained at  | 0.25  | Check        |
| PLAT300_ALERT_4_G | Atom Site Occupancy of C7BA          Constrained at  | 0.25  | Check        |
| PLAT300_ALERT_4_G | Atom Site Occupancy of H9AA          Constrained at  | 0.75  | Check        |
| PLAT300_ALERT_4_G | Atom Site Occupancy of H4BA          Constrained at  | 0.75  | Check        |
| PLAT300_ALERT_4_G | Atom Site Occupancy of H17           Constrained at  | 0.75  | Check        |
| PLAT300_ALERT_4_G | Atom Site Occupancy of H6            Constrained at  | 0.25  | Check        |
| PLAT300_ALERT_4_G | Atom Site Occupancy of H8            Constrained at  | 0.25  | Check        |
| PLAT300_ALERT_4_G | Atom Site Occupancy of H9BA          Constrained at  | 0.25  | Check        |
| PLAT301_ALERT_3_G | Main Residue Disorder .....(Resd 1   )               | 19%   | Note         |
| PLAT432_ALERT_2_G | Short Inter X...Y Contact   F1            ..C0AA     | 2.96  | Ang.         |
| PLAT720_ALERT_4_G | Number of Unusual/Non-Standard Labels .....          | 49    | Note         |

|                                                                    |       |       |
|--------------------------------------------------------------------|-------|-------|
| PLAT764_ALERT_4_G Overcomplete CIF Bond List Detected (Rep/Expd) . | 1.23  | Ratio |
| PLAT773_ALERT_2_G Check long C-C Bond in CIF: C17 --C8BA           | 1.98  | Ang.  |
| PLAT773_ALERT_2_G Check long C-C Bond in CIF: C3AA --C6            | 1.91  | Ang.  |
| PLAT779_ALERT_4_G Suspect or Irrelevant (Bond) Angle in CIF .... # | 97    | Check |
| C8BA -O0AA -C9       1.555   1.555   1.555                         | 40.60 | Deg.  |
| PLAT779_ALERT_4_G Suspect or Irrelevant (Bond) Angle in CIF .... # | 99    | Check |
| C3AA -O1AA -C6BA   1.555   1.555   1.555                           | 43.80 | Deg.  |
| PLAT779_ALERT_4_G Suspect or Irrelevant (Bond) Angle in CIF .... # | 114   | Check |
| C9    -C17   -C8BA   1.555   1.555   1.555                         | 22.40 | Deg.  |
| PLAT779_ALERT_4_G Suspect or Irrelevant (Bond) Angle in CIF .... # | 133   | Check |
| C6BA -C3AA -C6       1.555   1.555   1.555                         | 43.60 | Deg.  |
| PLAT779_ALERT_4_G Suspect or Irrelevant (Bond) Angle in CIF .... # | 159   | Check |
| C9    -C14   -C8BA   1.555   1.555   1.555                         | 32.40 | Deg.  |
| PLAT779_ALERT_4_G Suspect or Irrelevant (Bond) Angle in CIF .... # | 184   | Check |
| C6BA -C7AA -C3AA   1.555   1.555   1.555                           | 34.40 | Deg.  |
| PLAT779_ALERT_4_G Suspect or Irrelevant (Bond) Angle in CIF .... # | 207   | Check |
| C0BA -C1BA -C11   1.555   1.555   1.555                            | 38.80 | Deg.  |
| PLAT779_ALERT_4_G Suspect or Irrelevant (Bond) Angle in CIF .... # | 245   | Check |
| C7AA -C6BA -F5AA   1.555   1.555   1.555                           | 42.60 | Deg.  |
| PLAT779_ALERT_4_G Suspect or Irrelevant (Bond) Angle in CIF .... # | 250   | Check |
| C6BA -C6    -C3AA   1.555   1.555   1.555                          | 27.50 | Deg.  |
| PLAT779_ALERT_4_G Suspect or Irrelevant (Bond) Angle in CIF .... # | 257   | Check |
| C9    -C8BA -C17   1.555   1.555   1.555                           | 37.70 | Deg.  |
| PLAT779_ALERT_4_G Suspect or Irrelevant (Bond) Angle in CIF .... # | 263   | Check |
| C14   -C8BA -F11   1.555   1.555   1.555                           | 42.80 | Deg.  |
| PLAT789_ALERT_4_G Atoms with Negative _atom_site_disorder_group #  | 36    | Check |
| PLAT794_ALERT_5_G Tentative Bond Valency for Ga2           (III) . | 3.31  | Info  |
| PLAT850_ALERT_4_G Check Flack Parameter Exact Value 0.00 and s.u.  | 0.02  | Check |
| PLAT860_ALERT_3_G Number of Least-Squares Restraints .....         | 75    | Note  |
| PLAT933_ALERT_2_G Number of OMIT Records in Embedded .res File ... | 1     | Note  |

---

0 **ALERT level A** = Most likely a serious problem - resolve or explain  
 0 **ALERT level B** = A potentially serious problem, consider carefully  
 10 **ALERT level C** = Check. Ensure it is not caused by an omission or oversight  
 61 **ALERT level G** = General information/check it is not something unexpected

3 **ALERT type 1** CIF construction/syntax error, inconsistent or missing data  
 16 **ALERT type 2** Indicator that the structure model may be wrong or deficient  
 7 **ALERT type 3** Indicator that the structure quality may be low  
 44 **ALERT type 4** Improvement, methodology, query or suggestion  
 1 **ALERT type 5** Informative message, check

---

It is advisable to attempt to resolve as many as possible of the alerts in all categories. Often the minor alerts point to easily fixed oversights, errors and omissions in your CIF or refinement strategy, so attention to these fine details can be worthwhile. In order to resolve some of the more serious problems it may be necessary to carry out additional measurements or structure refinements. However, the purpose of your study may justify the reported deviations and the more serious of these should normally be commented upon in the discussion or experimental section of a paper or in the "special\_details" fields of the CIF. checkCIF was carefully designed to identify outliers and unusual parameters, but every test has its limitations and alerts that are not important in a particular case may appear. Conversely, the absence of alerts does not guarantee there are no aspects of the results needing attention. It is up to the individual to critically assess their own results and, if necessary, seek expert advice.

### **Publication of your CIF in IUCr journals**

A basic structural check has been run on your CIF. These basic checks will be run on all CIFs submitted for publication in IUCr journals (*Acta Crystallographica*, *Journal of Applied Crystallography*, *Journal of Synchrotron Radiation*); however, if you intend to submit to *Acta Crystallographica Section C* or *E* or *IUCrData*, you should make sure that full publication checks are run on the final version of your CIF prior to submission.

### **Publication of your CIF in other journals**

Please refer to the *Notes for Authors* of the relevant journal for any special instructions relating to CIF submission.

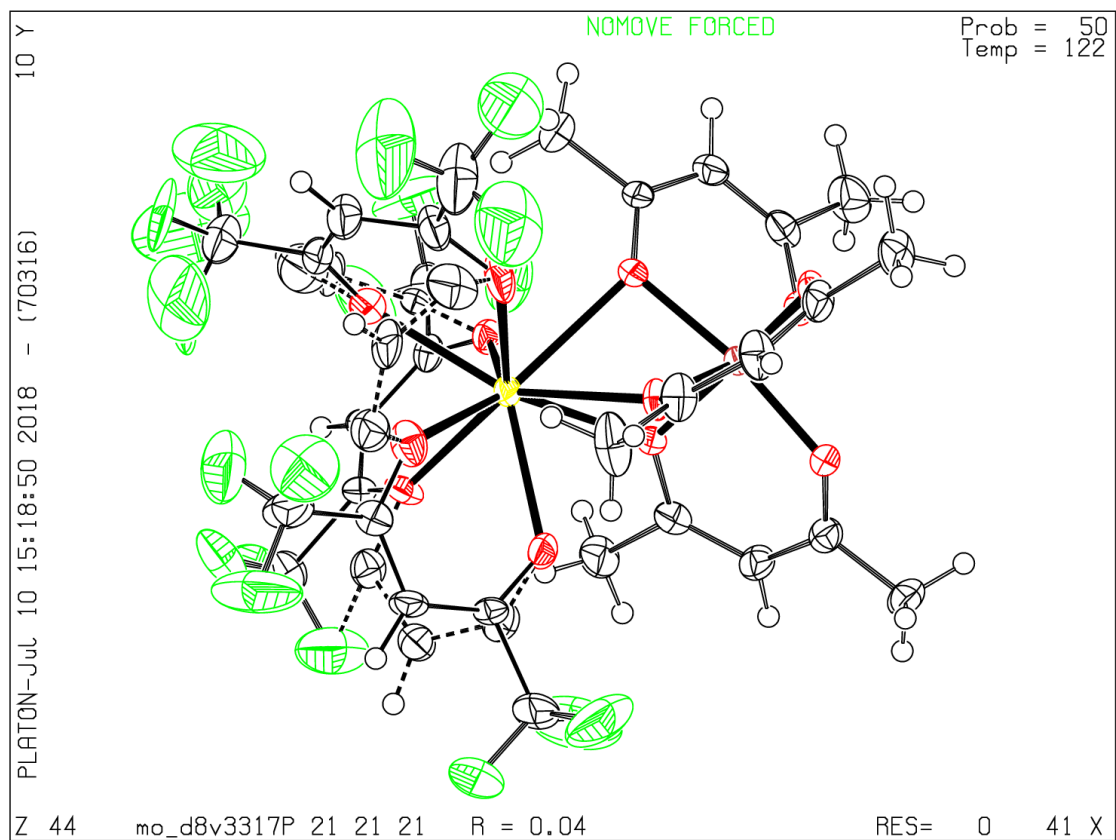

Supplement: s1 [file s1]
