# Supplementary material
Source: MDPI journal article supplement (https://www.mdpi.com/2304-6740/6/3/72)

# checkCIF/PLATON report

You have not supplied any structure factors. As a result the full set of tests cannot be run.

THIS REPORT IS FOR GUIDANCE ONLY. IF USED AS PART OF A REVIEW PROCEDURE FOR PUBLICATION, IT SHOULD NOT REPLACE THE EXPERTISE OF AN EXPERIENCED CRYSTALLOGRAPHIC REFEREE.

No syntax errors found.      CIF dictionary      Interpreting this report

## Datablock: mo\_d8v3299\_0m

---

|                 |                       |                       |             |
|-----------------|-----------------------|-----------------------|-------------|
| Bond precision: | C-C = 0.0101 A        | Wavelength=0.71073    |             |
| Cell:           | a=12.495(4)           | b=15.905(5)           | c=20.533(6) |
|                 | alpha=90              | beta=90               | gamma=90    |
| Temperature:    | 122 K                 |                       |             |
|                 | Calculated            | Reported              |             |
| Volume          | 4081(2)               | 4081(2)               |             |
| Space group     | P 21 21 21            | P 21 21 21            |             |
| Hall group      | P 2ac 2ab             | P 2ac 2ab             |             |
| Moiety formula  | C30 H24 F18 Ga O12 Pr | C30 H24 F18 Ga O12 Pr |             |
| Sum formula     | C30 H24 F18 Ga O12 Pr | C30 H24 F18 Ga O12 Pr |             |
| Mr              | 1129.12               | 1129.12               |             |
| Dx,g cm-3       | 1.838                 | 1.838                 |             |
| Z               | 4                     | 4                     |             |
| Mu (mm-1)       | 1.978                 | 1.978                 |             |
| F000            | 2208.0                | 2208.0                |             |
| F000'           | 2209.92               |                       |             |
| h,k,lmax        | 17,22,29              | 17,22,29              |             |
| Nref            | 12568[ 6897]          | 12538                 |             |
| Tmin,Tmax       | 0.566,0.597           | 0.629,0.746           |             |
| Tmin'           | 0.555                 |                       |             |

Correction method= # Reported T Limits: Tmin=0.629 Tmax=0.746  
AbsCorr = MULTI-SCAN

Data completeness= 1.82/1.00      Theta(max)= 30.619

R(reflections)= 0.0431( 11438)      wR2(reflections)= 0.1074( 12538)

S = 1.060      Npar= 715

---

The following ALERTS were generated. Each ALERT has the format

**test-name\_ALERT\_alert-type\_alert-level.**

Click on the hyperlinks for more details of the test.

---

**Alert level B**

PLAT220\_ALERT\_2\_B Non-Solvent Resd 1 C Ueq(max)/Ueq(min) Range 8.3 Ratio

---

**Alert level C**

PLAT213\_ALERT\_2\_C Atom F18 has ADP max/min Ratio ..... 3.1 prolat  
PLAT213\_ALERT\_2\_C Atom C8AA has ADP max/min Ratio ..... 3.2 prolat  
PLAT213\_ALERT\_2\_C Atom C7 has ADP max/min Ratio ..... 3.2 prolat  
PLAT215\_ALERT\_3\_C Disordered F9 has ADP max/min Ratio ..... 3.2 Note  
PLAT220\_ALERT\_2\_C Non-Solvent Resd 1 F Ueq(max)/Ueq(min) Range 3.9 Ratio  
PLAT222\_ALERT\_3\_C Non-Solv. Resd 1 H Uiso(max)/Uiso(min) Range 5.2 Ratio  
PLAT234\_ALERT\_4\_C Large Hirshfeld Difference F4AA --C7 0.23 Ang.  
PLAT234\_ALERT\_4\_C Large Hirshfeld Difference O10 --C6BA 0.18 Ang.  
PLAT234\_ALERT\_4\_C Large Hirshfeld Difference O12 --C2 0.21 Ang.  
PLAT234\_ALERT\_4\_C Large Hirshfeld Difference C7 --C9AA 0.16 Ang.  
PLAT234\_ALERT\_4\_C Large Hirshfeld Difference C9 --C7AA 0.17 Ang.  
PLAT241\_ALERT\_2\_C High 'MainMol' Ueq as Compared to Neighbors of O19 Check  
PLAT342\_ALERT\_3\_C Low Bond Precision on C-C Bonds ..... 0.01008 Ang.  
PLAT790\_ALERT\_4\_C Centre of Gravity not Within Unit Cell: Resd. # 1 Note  
C30 H24 F18 Ga O12 Pr

---

**Alert level G**

PLAT002\_ALERT\_2\_G Number of Distance or Angle Restraints on AtSite 24 Note  
PLAT003\_ALERT\_2\_G Number of Uiso or Uij Restrained non-H Atoms ... 3 Report  
PLAT012\_ALERT\_1\_G No \_shelx\_res\_checksum Found in CIF ..... Please Check  
PLAT083\_ALERT\_2\_G SHELXL Second Parameter in WGHT Unusually Large 13.17 Why ?  
PLAT172\_ALERT\_4\_G The CIF-Embedded .res File Contains DFIX Records 2 Report  
PLAT186\_ALERT\_4\_G The CIF-Embedded .res File Contains ISOR Records 3 Report  
PLAT230\_ALERT\_2\_G Hirshfeld Test Diff for O9 --C2BA . 7.0 s.u.  
PLAT230\_ALERT\_2\_G Hirshfeld Test Diff for O9 --C9BA . 5.4 s.u.  
PLAT230\_ALERT\_2\_G Hirshfeld Test Diff for F6AA --C9 . 5.7 s.u.  
PLAT230\_ALERT\_2\_G Hirshfeld Test Diff for C1AA --C6AA . 5.4 s.u.  
PLAT230\_ALERT\_2\_G Hirshfeld Test Diff for C5 --C8AA . 9.9 s.u.  
PLAT242\_ALERT\_2\_G Low 'MainMol' Ueq as Compared to Neighbors of C1AA Check  
PLAT242\_ALERT\_2\_G Low 'MainMol' Ueq as Compared to Neighbors of C3 Check  
PLAT242\_ALERT\_2\_G Low 'MainMol' Ueq as Compared to Neighbors of C8AA Check  
PLAT242\_ALERT\_2\_G Low 'MainMol' Ueq as Compared to Neighbors of C7 Check  
PLAT300\_ALERT\_4\_G Atom Site Occupancy of F4 Constrained at 0.5 Check  
PLAT300\_ALERT\_4\_G Atom Site Occupancy of F9 Constrained at 0.5 Check  
PLAT300\_ALERT\_4\_G Atom Site Occupancy of F9AA Constrained at 0.5 Check  
PLAT300\_ALERT\_4\_G Atom Site Occupancy of F8AA Constrained at 0.5 Check  
PLAT300\_ALERT\_4\_G Atom Site Occupancy of F7AA Constrained at 0.5 Check  
PLAT300\_ALERT\_4\_G Atom Site Occupancy of F16 Constrained at 0.5 Check  
PLAT300\_ALERT\_4\_G Atom Site Occupancy of C1 Constrained at 0.5 Check  
PLAT300\_ALERT\_4\_G Atom Site Occupancy of C2 Constrained at 0.5 Check  
PLAT300\_ALERT\_4\_G Atom Site Occupancy of C4 Constrained at 0.5 Check  
PLAT300\_ALERT\_4\_G Atom Site Occupancy of C5 Constrained at 0.5 Check  
PLAT300\_ALERT\_4\_G Atom Site Occupancy of C6AA Constrained at 0.5 Check  
PLAT300\_ALERT\_4\_G Atom Site Occupancy of C7AA Constrained at 0.5 Check  
PLAT300\_ALERT\_4\_G Atom Site Occupancy of C1BA Constrained at 0.5 Check  
PLAT300\_ALERT\_4\_G Atom Site Occupancy of C9AA Constrained at 0.5 Check  
PLAT300\_ALERT\_4\_G Atom Site Occupancy of C0BA Constrained at 0.5 Check  
PLAT300\_ALERT\_4\_G Atom Site Occupancy of C2BA Constrained at 0.5 Check  
PLAT300\_ALERT\_4\_G Atom Site Occupancy of C14 Constrained at 0.5 Check  
PLAT300\_ALERT\_4\_G Atom Site Occupancy of C3BA Constrained at 0.5 Check  
PLAT300\_ALERT\_4\_G Atom Site Occupancy of C15 Constrained at 0.5 Check  
PLAT300\_ALERT\_4\_G Atom Site Occupancy of C5BA Constrained at 0.5 Check  
PLAT300\_ALERT\_4\_G Atom Site Occupancy of C4BA Constrained at 0.5 Check  
PLAT300\_ALERT\_4\_G Atom Site Occupancy of C6BA Constrained at 0.5 Check  
PLAT300\_ALERT\_4\_G Atom Site Occupancy of C7BA Constrained at 0.5 Check

|                   |                                                  |                |       |       |
|-------------------|--------------------------------------------------|----------------|-------|-------|
| PLAT300_ALERT_4_G | Atom Site Occupancy of C8BA                      | Constrained at | 0.5   | Check |
| PLAT300_ALERT_4_G | Atom Site Occupancy of C9BA                      | Constrained at | 0.5   | Check |
| PLAT300_ALERT_4_G | Atom Site Occupancy of C0CA                      | Constrained at | 0.5   | Check |
| PLAT300_ALERT_4_G | Atom Site Occupancy of H0BA                      | Constrained at | 0.5   | Check |
| PLAT300_ALERT_4_G | Atom Site Occupancy of H3BA                      | Constrained at | 0.5   | Check |
| PLAT300_ALERT_4_G | Atom Site Occupancy of H5BA                      | Constrained at | 0.5   | Check |
| PLAT300_ALERT_4_G | Atom Site Occupancy of H4BA                      | Constrained at | 0.5   | Check |
| PLAT300_ALERT_4_G | Atom Site Occupancy of H15                       | Constrained at | 0.5   | Check |
| PLAT300_ALERT_4_G | Atom Site Occupancy of H8BA                      | Constrained at | 0.5   | Check |
| PLAT301_ALERT_3_G | Main Residue Disorder .....(Resd 1 )             |                | 29%   | Note  |
| PLAT432_ALERT_2_G | Short Inter X...Y Contact F0AA ..C11             |                | 2.97  | Ang.  |
| PLAT432_ALERT_2_G | Short Inter X...Y Contact F6 ..C3BA              |                | 2.93  | Ang.  |
| PLAT434_ALERT_2_G | Short Inter HL..HL Contact F6 ..F9AA             |                | 2.71  | Ang.  |
| PLAT720_ALERT_4_G | Number of Unusual/Non-Standard Labels .....      |                | 47    | Note  |
| PLAT764_ALERT_4_G | Overcomplete CIF Bond List Detected (Rep/Expd) . |                | 1.26  | Ratio |
| PLAT773_ALERT_2_G | Check long C-C Bond in CIF: C5 --C4BA            |                | 2.00  | Ang.  |
| PLAT773_ALERT_2_G | Check long C-C Bond in CIF: C15 --C4             |                | 2.03  | Ang.  |
| PLAT773_ALERT_2_G | Check long C-C Bond in CIF: C2BA --C0CA          |                | 1.74  | Ang.  |
| PLAT779_ALERT_4_G | Suspect or Irrelevant (Bond) Angle in CIF .... # |                | 77    | Check |
|                   | C4 -O5 -C6AA 1.555 1.555 1.555                   |                | 44.30 | Deg.  |
| PLAT779_ALERT_4_G | Suspect or Irrelevant (Bond) Angle in CIF .... # |                | 104   | Check |
|                   | C14 -F4 -C0CA 1.555 1.555 1.555                  |                | 18.90 | Deg.  |
| PLAT779_ALERT_4_G | Suspect or Irrelevant (Bond) Angle in CIF .... # |                | 105   | Check |
|                   | F7AA -F4 -C14 1.555 1.555 1.555                  |                | 42.00 | Deg.  |
| PLAT779_ALERT_4_G | Suspect or Irrelevant (Bond) Angle in CIF .... # |                | 140   | Check |
|                   | F16 -C14 -F8AA 1.555 1.555 1.555                 |                | 22.90 | Deg.  |
| PLAT779_ALERT_4_G | Suspect or Irrelevant (Bond) Angle in CIF .... # |                | 153   | Check |
|                   | C0CA -C14 -F16 1.555 1.555 1.555                 |                | 9.00  | Deg.  |
| PLAT779_ALERT_4_G | Suspect or Irrelevant (Bond) Angle in CIF .... # |                | 158   | Check |
|                   | C0CA -C14 -F8AA 1.555 1.555 1.555                |                | 28.00 | Deg.  |
| PLAT779_ALERT_4_G | Suspect or Irrelevant (Bond) Angle in CIF .... # |                | 160   | Check |
|                   | F7AA -C14 -F4 1.555 1.555 1.555                  |                | 30.50 | Deg.  |
| PLAT779_ALERT_4_G | Suspect or Irrelevant (Bond) Angle in CIF .... # |                | 173   | Check |
|                   | C0CA -F16 -C14 1.555 1.555 1.555                 |                | 7.00  | Deg.  |
| PLAT779_ALERT_4_G | Suspect or Irrelevant (Bond) Angle in CIF .... # |                | 186   | Check |
|                   | C6AA -C1AA -C4 1.555 1.555 1.555                 |                | 34.90 | Deg.  |
| PLAT779_ALERT_4_G | Suspect or Irrelevant (Bond) Angle in CIF .... # |                | 196   | Check |
|                   | C2 -C5 -C4BA 1.555 1.555 1.555                   |                | 40.50 | Deg.  |
| PLAT779_ALERT_4_G | Suspect or Irrelevant (Bond) Angle in CIF .... # |                | 200   | Check |
|                   | C14 -F9 -C0CA 1.555 1.555 1.555                  |                | 21.50 | Deg.  |
| PLAT779_ALERT_4_G | Suspect or Irrelevant (Bond) Angle in CIF .... # |                | 201   | Check |
|                   | C14 -F9 -F7AA 1.555 1.555 1.555                  |                | 38.00 | Deg.  |
| PLAT779_ALERT_4_G | Suspect or Irrelevant (Bond) Angle in CIF .... # |                | 215   | Check |
|                   | C2 -C8AA -C5 1.555 1.555 1.555                   |                | 36.20 | Deg.  |
| PLAT779_ALERT_4_G | Suspect or Irrelevant (Bond) Angle in CIF .... # |                | 216   | Check |
|                   | C6AA -C15 -C4 1.555 1.555 1.555                  |                | 24.40 | Deg.  |
| PLAT779_ALERT_4_G | Suspect or Irrelevant (Bond) Angle in CIF .... # |                | 250   | Check |
|                   | C9AA -C7 -C7BA 1.555 1.555 1.555                 |                | 41.30 | Deg.  |
| PLAT779_ALERT_4_G | Suspect or Irrelevant (Bond) Angle in CIF .... # |                | 272   | Check |
|                   | C14 -C2BA -C0CA 1.555 1.555 1.555                |                | 19.40 | Deg.  |
| PLAT779_ALERT_4_G | Suspect or Irrelevant (Bond) Angle in CIF .... # |                | 278   | Check |
|                   | C3 -F10 -C6BA 1.555 1.555 1.555                  |                | 42.90 | Deg.  |
| PLAT779_ALERT_4_G | Suspect or Irrelevant (Bond) Angle in CIF .... # |                | 298   | Check |
|                   | C6AA -C4 -C15 1.555 1.555 1.555                  |                | 37.20 | Deg.  |
| PLAT779_ALERT_4_G | Suspect or Irrelevant (Bond) Angle in CIF .... # |                | 304   | Check |
|                   | C2 -C4BA -C5 1.555 1.555 1.555                   |                | 27.40 | Deg.  |
| PLAT779_ALERT_4_G | Suspect or Irrelevant (Bond) Angle in CIF .... # |                | 308   | Check |
|                   | C3 -C6BA -F10 1.555 1.555 1.555                  |                | 44.90 | Deg.  |
| PLAT779_ALERT_4_G | Suspect or Irrelevant (Bond) Angle in CIF .... # |                | 334   | Check |
|                   | C0CA -C9BA -C14 1.555 1.555 1.555                |                | 20.50 | Deg.  |
| PLAT779_ALERT_4_G | Suspect or Irrelevant (Bond) Angle in CIF .... # |                | 335   | Check |
|                   | C0CA -C9BA -F16 1.555 1.555 1.555                |                | 28.90 | Deg.  |

|                   |                                                  |       |        |
|-------------------|--------------------------------------------------|-------|--------|
| PLAT779_ALERT_4_G | Suspect or Irrelevant (Bond) Angle in CIF .... # | 341   | Check  |
| C0CA -F9AA -C14   | 1.555 1.555 1.555                                | 24.50 | Deg.   |
| PLAT779_ALERT_4_G | Suspect or Irrelevant (Bond) Angle in CIF .... # | 342   | Check  |
| C0CA -F9AA -F16   | 1.555 1.555 1.555                                | 26.40 | Deg.   |
| PLAT779_ALERT_4_G | Suspect or Irrelevant (Bond) Angle in CIF .... # | 343   | Check  |
| F16 -F8AA -C14    | 1.555 1.555 1.555                                | 40.90 | Deg.   |
| PLAT779_ALERT_4_G | Suspect or Irrelevant (Bond) Angle in CIF .... # | 344   | Check  |
| F16 -F8AA -C0CA   | 1.555 1.555 1.555                                | 29.90 | Deg.   |
| PLAT779_ALERT_4_G | Suspect or Irrelevant (Bond) Angle in CIF .... # | 345   | Check  |
| C0CA -F8AA -C14   | 1.555 1.555 1.555                                | 11.80 | Deg.   |
| PLAT779_ALERT_4_G | Suspect or Irrelevant (Bond) Angle in CIF .... # | 354   | Check  |
| C14 -C0CA -F7AA   | 1.555 1.555 1.555                                | 37.00 | Deg.   |
| PLAT779_ALERT_4_G | Suspect or Irrelevant (Bond) Angle in CIF .... # | 360   | Check  |
| F16 -C0CA -F8AA   | 1.555 1.555 1.555                                | 31.50 | Deg.   |
| PLAT779_ALERT_4_G | Suspect or Irrelevant (Bond) Angle in CIF .... # | 377   | Check  |
| F7AA -C0CA -F4    | 1.555 1.555 1.555                                | 23.60 | Deg.   |
| PLAT779_ALERT_4_G | Suspect or Irrelevant (Bond) Angle in CIF .... # | 386   | Check  |
| C14 -F7AA -C0CA   | 1.555 1.555 1.555                                | 23.20 | Deg.   |
| PLAT789_ALERT_4_G | Atoms with Negative _atom_site_disorder_group #  | 16    | Check  |
| PLAT794_ALERT_5_G | Tentative Bond Valency for Ga2 (III) .           | 3.32  | Info   |
| PLAT811_ALERT_5_G | No ADDSYM Analysis: Too Many Excluded Atoms .... |       | ! Info |
| PLAT860_ALERT_3_G | Number of Least-Squares Restraints .....         | 42    | Note   |
| PLAT933_ALERT_2_G | Number of OMIT Records in Embedded .res File ... | 3     | Note   |

---

0 **ALERT level A** = Most likely a serious problem - resolve or explain  
 1 **ALERT level B** = A potentially serious problem, consider carefully  
 14 **ALERT level C** = Check. Ensure it is not caused by an omission or oversight  
 92 **ALERT level G** = General information/check it is not something unexpected

1 ALERT type 1 CIF construction/syntax error, inconsistent or missing data  
 25 ALERT type 2 Indicator that the structure model may be wrong or deficient  
 5 ALERT type 3 Indicator that the structure quality may be low  
 74 ALERT type 4 Improvement, methodology, query or suggestion  
 2 ALERT type 5 Informative message, check

---

It is advisable to attempt to resolve as many as possible of the alerts in all categories. Often the minor alerts point to easily fixed oversights, errors and omissions in your CIF or refinement strategy, so attention to these fine details can be worthwhile. In order to resolve some of the more serious problems it may be necessary to carry out additional measurements or structure refinements. However, the purpose of your study may justify the reported deviations and the more serious of these should normally be commented upon in the discussion or experimental section of a paper or in the "special\_details" fields of the CIF. checkCIF was carefully designed to identify outliers and unusual parameters, but every test has its limitations and alerts that are not important in a particular case may appear. Conversely, the absence of alerts does not guarantee there are no aspects of the results needing attention. It is up to the individual to critically assess their own results and, if necessary, seek expert advice.

### **Publication of your CIF in IUCr journals**

A basic structural check has been run on your CIF. These basic checks will be run on all CIFs submitted for publication in IUCr journals (*Acta Crystallographica*, *Journal of Applied Crystallography*, *Journal of Synchrotron Radiation*); however, if you intend to submit to *Acta Crystallographica Section C* or *E* or *IUCrData*, you should make sure that full publication checks are run on the final version of your CIF prior to submission.

### **Publication of your CIF in other journals**

Please refer to the *Notes for Authors* of the relevant journal for any special instructions relating to CIF submission.

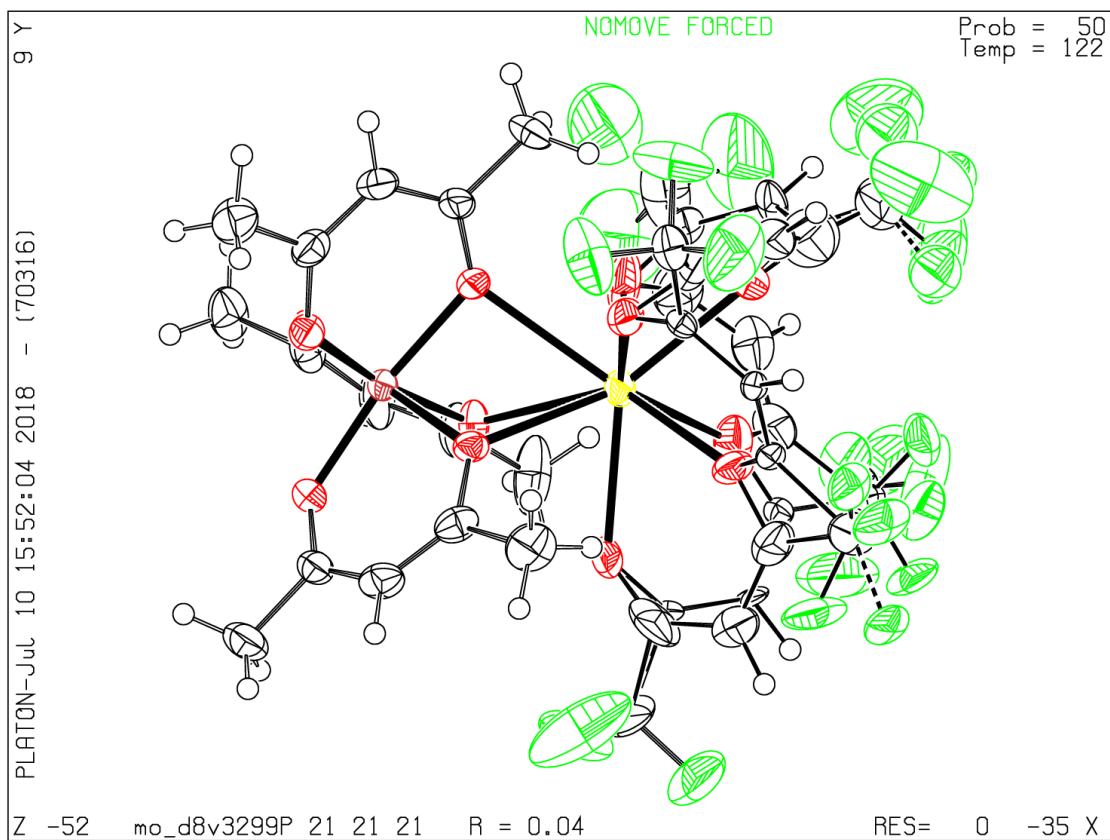

Supplement: s1 [file s1]
