# Supplementary material
Source: MDPI journal article supplement (https://www.mdpi.com/2304-6740/6/3/72)

# checkCIF/PLATON report

You have not supplied any structure factors. As a result the full set of tests cannot be run.

THIS REPORT IS FOR GUIDANCE ONLY. IF USED AS PART OF A REVIEW PROCEDURE FOR PUBLICATION, IT SHOULD NOT REPLACE THE EXPERTISE OF AN EXPERIENCED CRYSTALLOGRAPHIC REFEREE.

No syntax errors found.      CIF dictionary      Interpreting this report

## Datablock: mo\_d8v3276\_0m

---

Bond precision:    C-C = 0.0168 Å                      Wavelength=0.71073

Cell:                      a=12.6928(15)              b=15.7124(19)              c=20.603(2)  
                                alpha=90                      beta=90                      gamma=90

Temperature:              122 K

|                | Calculated            | Reported              |
|----------------|-----------------------|-----------------------|
| Volume         | 4109.0(8)             | 4109.0(8)             |
| Space group    | P 21 21 21            | P 21 21 21            |
| Hall group     | P 2ac 2ab             | P 2ac 2ab             |
| Moiety formula | C30 H24 Cr F18 La O12 | C30 H24 Cr F18 La O12 |
| Sum formula    | C30 H24 Cr F18 La O12 | C30 H24 Cr F18 La O12 |
| Mr             | 1109.40               | 1109.40               |
| Dx,g cm-3      | 1.793                 | 1.793                 |
| Z              | 4                     | 4                     |
| Mu (mm-1)      | 1.427                 | 1.427                 |
| F000           | 2172.0                | 2172.0                |
| F000'          | 2174.04               |                       |
| h,k,lmax       | 16,20,27              | 16,20,27              |
| Nref           | 10197[ 5628]          | 10186                 |
| Tmin,Tmax      | 0.859,0.900           | 0.643,0.746           |
| Tmin'          | 0.780                 |                       |

Correction method= # Reported T Limits: Tmin=0.643 Tmax=0.746  
AbsCorr = MULTI-SCAN

Data completeness= 1.81/1.00                      Theta(max)= 28.282

R(reflections)= 0.0676( 8846)                      wR2(reflections)= 0.1767( 10186)

S = 1.050                      Npar= 646

---

The following ALERTS were generated. Each ALERT has the format

**test-name\_ALERT\_alert-type\_alert-level.**

Click on the hyperlinks for more details of the test.

---

**Alert level B**

PLAT230\_ALERT\_2\_B Hirshfeld Test Diff for F6AA --C8AA . 8.3 s.u.

---

**Alert level C**

PLAT213\_ALERT\_2\_C Atom F5 has ADP max/min Ratio ..... 3.1 prolat  
PLAT215\_ALERT\_3\_C Disordered C6# has ADP max/min Ratio ..... 3.2 Note  
PLAT220\_ALERT\_2\_C Non-Solvent Resd 1 C Ueq(max)/Ueq(min) Range 5.4 Ratio  
PLAT220\_ALERT\_2\_C Non-Solvent Resd 1 F Ueq(max)/Ueq(min) Range 3.6 Ratio  
PLAT222\_ALERT\_3\_C Non-Solv. Resd 1 H Uiso(max)/Uiso(min) Range 4.9 Ratio  
PLAT230\_ALERT\_2\_C Hirshfeld Test Diff for F5AA --C8AA . 6.7 s.u.  
PLAT234\_ALERT\_4\_C Large Hirshfeld Difference F4 --C7 0.17 Ang.  
PLAT234\_ALERT\_4\_C Large Hirshfeld Difference O13 --C10 0.18 Ang.  
PLAT234\_ALERT\_4\_C Large Hirshfeld Difference O13 --C5BA 0.24 Ang.  
PLAT234\_ALERT\_4\_C Large Hirshfeld Difference O16 --C5 0.20 Ang.  
PLAT234\_ALERT\_4\_C Large Hirshfeld Difference O16 --C0CA 0.18 Ang.  
PLAT234\_ALERT\_4\_C Large Hirshfeld Difference O17 --C1BA 0.16 Ang.  
PLAT234\_ALERT\_4\_C Large Hirshfeld Difference C1AA --C5AA 0.16 Ang.  
PLAT234\_ALERT\_4\_C Large Hirshfeld Difference C5 --C7AA 0.18 Ang.  
PLAT234\_ALERT\_4\_C Large Hirshfeld Difference C6 --C1BA 0.17 Ang.  
PLAT234\_ALERT\_4\_C Large Hirshfeld Difference C10 --C16 0.19 Ang.  
PLAT241\_ALERT\_2\_C High 'MainMol' Ueq as Compared to Neighbors of O16 Check  
PLAT241\_ALERT\_2\_C High 'MainMol' Ueq as Compared to Neighbors of O17 Check  
PLAT342\_ALERT\_3\_C Low Bond Precision on C-C Bonds ..... 0.01675 Ang.  
PLAT413\_ALERT\_2\_C Short Inter XH3 .. XHn H3BB ..H4BA 2.03 Ang.

---

**Alert level G**

PLAT002\_ALERT\_2\_G Number of Distance or Angle Restraints on AtSite 24 Note  
PLAT003\_ALERT\_2\_G Number of Uiso or Uij Restrained non-H Atoms ... 7 Report  
PLAT012\_ALERT\_1\_G No \_shelx\_res\_checksum Found in CIF ..... Please Check  
PLAT083\_ALERT\_2\_G SHELXL Second Parameter in WGHT Unusually Large 26.47 Why ?  
PLAT172\_ALERT\_4\_G The CIF-Embedded .res File Contains DFIX Records 2 Report  
PLAT186\_ALERT\_4\_G The CIF-Embedded .res File Contains ISOR Records 4 Report  
PLAT230\_ALERT\_2\_G Hirshfeld Test Diff for C8AA --C20 . 7.2 s.u.  
PLAT242\_ALERT\_2\_G Low 'MainMol' Ueq as Compared to Neighbors of C1AA Check  
PLAT242\_ALERT\_2\_G Low 'MainMol' Ueq as Compared to Neighbors of C6 Check  
PLAT242\_ALERT\_2\_G Low 'MainMol' Ueq as Compared to Neighbors of C7 Check  
PLAT242\_ALERT\_2\_G Low 'MainMol' Ueq as Compared to Neighbors of C7AA Check  
PLAT242\_ALERT\_2\_G Low 'MainMol' Ueq as Compared to Neighbors of C8AA Check  
PLAT242\_ALERT\_2\_G Low 'MainMol' Ueq as Compared to Neighbors of C16 Check  
PLAT300\_ALERT\_4\_G Atom Site Occupancy of C2 Constrained at 0.5 Check  
PLAT300\_ALERT\_4\_G Atom Site Occupancy of C3 Constrained at 0.5 Check  
PLAT300\_ALERT\_4\_G Atom Site Occupancy of C5 Constrained at 0.5 Check  
PLAT300\_ALERT\_4\_G Atom Site Occupancy of C4AA Constrained at 0.5 Check  
PLAT300\_ALERT\_4\_G Atom Site Occupancy of C5AA Constrained at 0.5 Check  
PLAT300\_ALERT\_4\_G Atom Site Occupancy of C10 Constrained at 0.5 Check  
PLAT300\_ALERT\_4\_G Atom Site Occupancy of C6AA Constrained at 0.5 Check  
PLAT300\_ALERT\_4\_G Atom Site Occupancy of C1BA Constrained at 0.5 Check  
PLAT300\_ALERT\_4\_G Atom Site Occupancy of C2BA Constrained at 0.5 Check  
PLAT300\_ALERT\_4\_G Atom Site Occupancy of C9BA Constrained at 0.5 Check  
PLAT300\_ALERT\_4\_G Atom Site Occupancy of C4BA Constrained at 0.5 Check  
PLAT300\_ALERT\_4\_G Atom Site Occupancy of C6BA Constrained at 0.5 Check  
PLAT300\_ALERT\_4\_G Atom Site Occupancy of C18 Constrained at 0.5 Check  
PLAT300\_ALERT\_4\_G Atom Site Occupancy of C8BA Constrained at 0.5 Check  
PLAT300\_ALERT\_4\_G Atom Site Occupancy of C7BA Constrained at 0.5 Check  
PLAT300\_ALERT\_4\_G Atom Site Occupancy of C20 Constrained at 0.5 Check  
PLAT300\_ALERT\_4\_G Atom Site Occupancy of C5BA Constrained at 0.5 Check  
PLAT300\_ALERT\_4\_G Atom Site Occupancy of C0CA Constrained at 0.5 Check  
PLAT300\_ALERT\_4\_G Atom Site Occupancy of H2 Constrained at 0.5 Check  
PLAT300\_ALERT\_4\_G Atom Site Occupancy of H6AA Constrained at 0.5 Check

|                   |                                                  |                   |       |       |
|-------------------|--------------------------------------------------|-------------------|-------|-------|
| PLAT300_ALERT_4_G | Atom Site Occupancy of H2BA                      | Constrained at    | 0.5   | Check |
| PLAT300_ALERT_4_G | Atom Site Occupancy of H18                       | Constrained at    | 0.5   | Check |
| PLAT300_ALERT_4_G | Atom Site Occupancy of H4BA                      | Constrained at    | 0.5   | Check |
| PLAT300_ALERT_4_G | Atom Site Occupancy of H6BA                      | Constrained at    | 0.5   | Check |
| PLAT301_ALERT_3_G | Main Residue Disorder .....                      | (Resd 1 )         | 15%   | Note  |
| PLAT432_ALERT_2_G | Short Inter X...Y Contact                        | F7AA ..C4BA       | 2.95  | Ang.  |
| PLAT432_ALERT_2_G | Short Inter X...Y Contact                        | F11 ..C2          | 2.89  | Ang.  |
| PLAT720_ALERT_4_G | Number of Unusual/Non-Standard Labels .....      |                   | 48    | Note  |
| PLAT773_ALERT_2_G | Check long C-C Bond in CIF: C7                   | --C8BA            | 1.75  | Ang.  |
| PLAT773_ALERT_2_G | Check long C-C Bond in CIF: C7AA                 | --C0CA            | 1.87  | Ang.  |
| PLAT779_ALERT_4_G | Suspect or Irrelevant (Bond) Angle in CIF .... # |                   | 201   | Check |
|                   | C7 -C8BA -F4                                     | 1.555 1.555 1.555 | 42.00 | Deg.  |
| PLAT779_ALERT_4_G | Suspect or Irrelevant (Bond) Angle in CIF .... # |                   | 210   | Check |
|                   | C16 -C5BA -F13                                   | 1.555 1.555 1.555 | 44.50 | Deg.  |
| PLAT794_ALERT_5_G | Tentative Bond Valency for Cr2                   | (III) .           | 3.19  | Info  |
| PLAT860_ALERT_3_G | Number of Least-Squares Restraints .....         |                   | 66    | Note  |

---

0 **ALERT level A** = Most likely a serious problem - resolve or explain  
 1 **ALERT level B** = A potentially serious problem, consider carefully  
 20 **ALERT level C** = Check. Ensure it is not caused by an omission or oversight  
 47 **ALERT level G** = General information/check it is not something unexpected

1 ALERT type 1 CIF construction/syntax error, inconsistent or missing data  
 22 ALERT type 2 Indicator that the structure model may be wrong or deficient  
 5 ALERT type 3 Indicator that the structure quality may be low  
 39 ALERT type 4 Improvement, methodology, query or suggestion  
 1 ALERT type 5 Informative message, check

---

It is advisable to attempt to resolve as many as possible of the alerts in all categories. Often the minor alerts point to easily fixed oversights, errors and omissions in your CIF or refinement strategy, so attention to these fine details can be worthwhile. In order to resolve some of the more serious problems it may be necessary to carry out additional measurements or structure refinements. However, the purpose of your study may justify the reported deviations and the more serious of these should normally be commented upon in the discussion or experimental section of a paper or in the "special\_details" fields of the CIF. checkCIF was carefully designed to identify outliers and unusual parameters, but every test has its limitations and alerts that are not important in a particular case may appear. Conversely, the absence of alerts does not guarantee there are no aspects of the results needing attention. It is up to the individual to critically assess their own results and, if necessary, seek expert advice.

### Publication of your CIF in IUCr journals

A basic structural check has been run on your CIF. These basic checks will be run on all CIFs submitted for publication in IUCr journals (*Acta Crystallographica*, *Journal of Applied Crystallography*, *Journal of Synchrotron Radiation*); however, if you intend to submit to *Acta Crystallographica Section C* or *E* or *IUCrData*, you should make sure that full publication checks are run on the final version of your CIF prior to submission.

### Publication of your CIF in other journals

Please refer to the *Notes for Authors* of the relevant journal for any special instructions relating to CIF submission.

PLATON version of 23/04/2018; check.def file version of 23/04/2018

Datablock mo\_d8v3276\_0m - ellipsoid plot

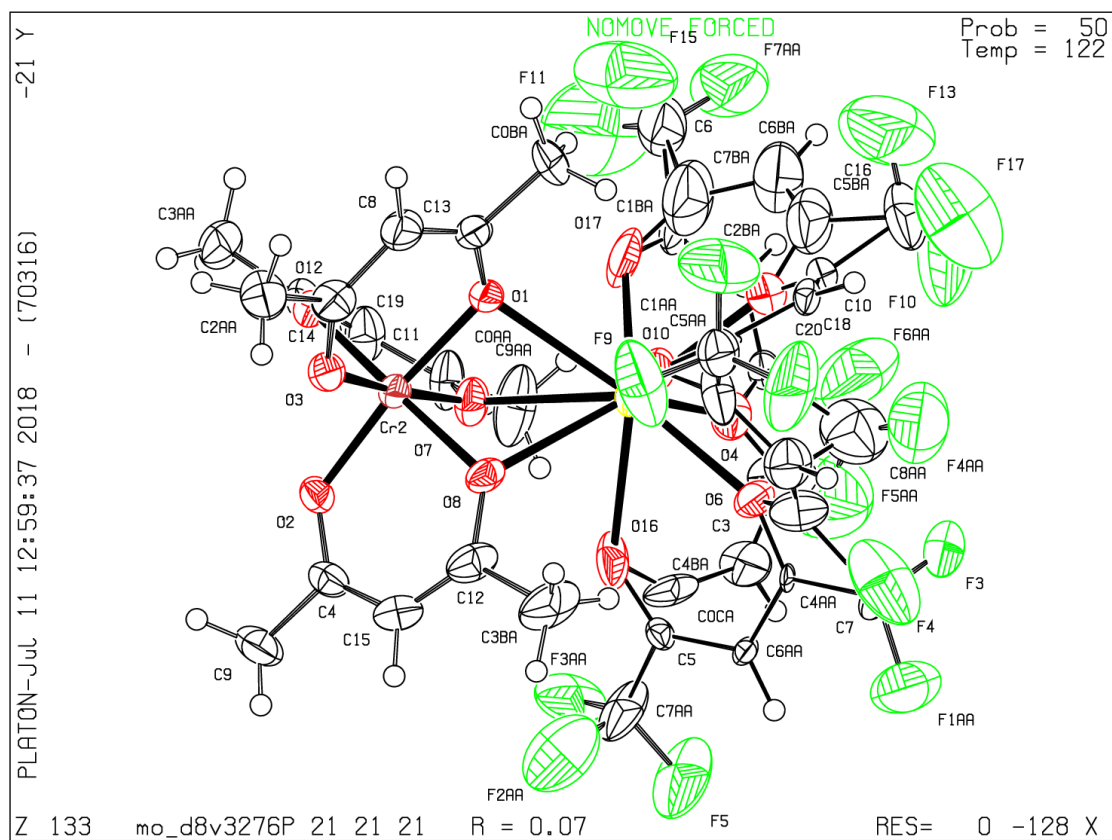

Supplement: s1 [file s1]
