# Supplementary material
Source: MDPI journal article supplement (https://www.mdpi.com/2304-6740/6/3/72)

# checkCIF/PLATON report

You have not supplied any structure factors. As a result the full set of tests cannot be run.

THIS REPORT IS FOR GUIDANCE ONLY. IF USED AS PART OF A REVIEW PROCEDURE FOR PUBLICATION, IT SHOULD NOT REPLACE THE EXPERTISE OF AN EXPERIENCED CRYSTALLOGRAPHIC REFEREE.

No syntax errors found.      CIF dictionary      Interpreting this report

## Datablock: mo\_d8v3172\_1\_0m\_morten

---

Bond precision:    C-C = 0.0172 Å                      Wavelength=0.71073

Cell:                      a=12.6186(6)              b=15.7588(8)              c=20.5581(9)  
                            alpha=90                      beta=90                      gamma=90  
Temperature:              122 K

|                | Calculated            | Reported              |
|----------------|-----------------------|-----------------------|
| Volume         | 4088.1(3)             | 4088.1(3)             |
| Space group    | P 21 21 21            | P 21 21 21            |
| Hall group     | P 2ac 2ab             | P 2ac 2ab             |
| Moiety formula | C30 H24 Cr F18 O12 Pr | C30 H24 Cr F18 O12 Pr |
| Sum formula    | C30 H24 Cr F18 O12 Pr | C30 H24 Cr F18 O12 Pr |
| Mr             | 1111.40               | 1111.40               |
| Dx,g cm-3      | 1.806                 | 1.806                 |
| Z              | 4                     | 4                     |
| Mu (mm-1)      | 1.581                 | 1.581                 |
| F000           | 2180.0                | 2180.0                |
| F000'          | 2182.32               |                       |
| h,k,lmax       | 15,18,24              | 15,18,24              |
| Nref           | 7478[ 4170]           | 7465                  |
| Tmin,Tmax      | 0.846,0.887           | 0.584,0.745           |
| Tmin'          | 0.822                 |                       |

Correction method= # Reported T Limits: Tmin=0.584 Tmax=0.745  
AbsCorr = MULTI-SCAN

Data completeness= 1.79/1.00                      Theta(max)= 25.349

R(reflections)= 0.0555( 6993)                      wR2(reflections)= 0.1433( 7465)

S = 1.073                                      Npar= 646

---

The following ALERTS were generated. Each ALERT has the format

**test-name\_ALERT\_alert-type\_alert-level.**

Click on the hyperlinks for more details of the test.

---

**Alert level B**

PLAT234\_ALERT\_4\_B Large Hirshfeld Difference F12 --C2AA 0.26 Ang.

---

**Alert level C**

PLAT090\_ALERT\_3\_C Poor Data / Parameter Ratio (Zmax > 18) ..... 6.46 Note  
PLAT220\_ALERT\_2\_C Non-Solvent Resd 1 C Ueq(max)/Ueq(min) Range 3.9 Ratio  
PLAT220\_ALERT\_2\_C Non-Solvent Resd 1 F Ueq(max)/Ueq(min) Range 3.6 Ratio  
PLAT230\_ALERT\_2\_C Hirshfeld Test Diff for F11 --C7AA . 6.3 s.u.  
PLAT234\_ALERT\_4\_C Large Hirshfeld Difference F1 --C4AA 0.20 Ang.  
PLAT234\_ALERT\_4\_C Large Hirshfeld Difference F0AA --C7AA 0.20 Ang.  
PLAT234\_ALERT\_4\_C Large Hirshfeld Difference F3AA --C3 0.19 Ang.  
PLAT234\_ALERT\_4\_C Large Hirshfeld Difference F2AA --C3 0.20 Ang.  
PLAT234\_ALERT\_4\_C Large Hirshfeld Difference F15 --C7AA 0.22 Ang.  
PLAT234\_ALERT\_4\_C Large Hirshfeld Difference O0AA --C4BA 0.16 Ang.  
PLAT234\_ALERT\_4\_C Large Hirshfeld Difference O2 --C9BA 0.18 Ang.  
PLAT234\_ALERT\_4\_C Large Hirshfeld Difference O13 --C8BA 0.19 Ang.  
PLAT234\_ALERT\_4\_C Large Hirshfeld Difference O17 --C5BA 0.17 Ang.  
PLAT234\_ALERT\_4\_C Large Hirshfeld Difference C7AA --C3BA 0.18 Ang.  
PLAT234\_ALERT\_4\_C Large Hirshfeld Difference C7AA --C8BA 0.19 Ang.  
PLAT241\_ALERT\_2\_C High 'MainMol' Ueq as Compared to Neighbors of O0AA Check  
PLAT342\_ALERT\_3\_C Low Bond Precision on C-C Bonds ..... 0.01725 Ang.  
PLAT413\_ALERT\_2\_C Short Inter XH3 .. XHn H5AB ..H7BA 2.01 Ang.

---

**Alert level G**

PLAT002\_ALERT\_2\_G Number of Distance or Angle Restraints on AtSite 24 Note  
PLAT003\_ALERT\_2\_G Number of Uiso or Uij Restrained non-H Atoms ... 9 Report  
PLAT012\_ALERT\_1\_G No \_shelx\_res\_checksum Found in CIF ..... Please Check  
PLAT083\_ALERT\_2\_G SHELXL Second Parameter in WGHT Unusually Large 22.48 Why ?  
PLAT172\_ALERT\_4\_G The CIF-Embedded .res File Contains DFIX Records 2 Report  
PLAT186\_ALERT\_4\_G The CIF-Embedded .res File Contains ISOR Records 2 Report  
PLAT242\_ALERT\_2\_G Low 'MainMol' Ueq as Compared to Neighbors of C3 Check  
PLAT242\_ALERT\_2\_G Low 'MainMol' Ueq as Compared to Neighbors of C4AA Check  
PLAT242\_ALERT\_2\_G Low 'MainMol' Ueq as Compared to Neighbors of C2AA Check  
PLAT242\_ALERT\_2\_G Low 'MainMol' Ueq as Compared to Neighbors of C7AA Check  
PLAT242\_ALERT\_2\_G Low 'MainMol' Ueq as Compared to Neighbors of C8AA Check  
PLAT242\_ALERT\_2\_G Low 'MainMol' Ueq as Compared to Neighbors of C10 Check  
PLAT300\_ALERT\_4\_G Atom Site Occupancy of C8 Constrained at 0.5 Check  
PLAT300\_ALERT\_4\_G Atom Site Occupancy of C9AA Constrained at 0.5 Check  
PLAT300\_ALERT\_4\_G Atom Site Occupancy of C11 Constrained at 0.5 Check  
PLAT300\_ALERT\_4\_G Atom Site Occupancy of C1BA Constrained at 0.5 Check  
PLAT300\_ALERT\_4\_G Atom Site Occupancy of C6BA Constrained at 0.5 Check  
PLAT300\_ALERT\_4\_G Atom Site Occupancy of C2BA Constrained at 0.5 Check  
PLAT300\_ALERT\_4\_G Atom Site Occupancy of C4BA Constrained at 0.5 Check  
PLAT300\_ALERT\_4\_G Atom Site Occupancy of C5BA Constrained at 0.5 Check  
PLAT300\_ALERT\_4\_G Atom Site Occupancy of C3BA Constrained at 0.5 Check  
PLAT300\_ALERT\_4\_G Atom Site Occupancy of C0CA Constrained at 0.5 Check  
PLAT300\_ALERT\_4\_G Atom Site Occupancy of C3AA Constrained at 0.5 Check  
PLAT300\_ALERT\_4\_G Atom Site Occupancy of C19 Constrained at 0.5 Check  
PLAT300\_ALERT\_4\_G Atom Site Occupancy of C8BA Constrained at 0.5 Check  
PLAT300\_ALERT\_4\_G Atom Site Occupancy of C9BA Constrained at 0.5 Check  
PLAT300\_ALERT\_4\_G Atom Site Occupancy of C7BA Constrained at 0.5 Check  
PLAT300\_ALERT\_4\_G Atom Site Occupancy of C2CA Constrained at 0.5 Check  
PLAT300\_ALERT\_4\_G Atom Site Occupancy of C1CA Constrained at 0.5 Check  
PLAT300\_ALERT\_4\_G Atom Site Occupancy of C3CA Constrained at 0.5 Check  
PLAT300\_ALERT\_4\_G Atom Site Occupancy of H11 Constrained at 0.5 Check  
PLAT300\_ALERT\_4\_G Atom Site Occupancy of H1BA Constrained at 0.5 Check  
PLAT300\_ALERT\_4\_G Atom Site Occupancy of H2BA Constrained at 0.5 Check  
PLAT300\_ALERT\_4\_G Atom Site Occupancy of H0CA Constrained at 0.5 Check  
PLAT300\_ALERT\_4\_G Atom Site Occupancy of H7BA Constrained at 0.5 Check

|                   |                                                  |                   |       |       |
|-------------------|--------------------------------------------------|-------------------|-------|-------|
| PLAT300_ALERT_4_G | Atom Site Occupancy of H2CA                      | Constrained at    | 0.5   | Check |
| PLAT301_ALERT_3_G | Main Residue Disorder .....                      | (Resd 1 )         | 15%   | Note  |
| PLAT720_ALERT_4_G | Number of Unusual/Non-Standard Labels .....      |                   | 46    | Note  |
| PLAT764_ALERT_4_G | Overcomplete CIF Bond List Detected (Rep/Expd) . |                   | 1.21  | Ratio |
| PLAT773_ALERT_2_G | Check long C-C Bond in CIF: C4AA                 | --C9BA            | 1.73  | Ang.  |
| PLAT773_ALERT_2_G | Check long C-C Bond in CIF: C8AA                 | --C3AA            | 1.79  | Ang.  |
| PLAT773_ALERT_2_G | Check long C-C Bond in CIF: C6BA                 | --C0CA            | 2.01  | Ang.  |
| PLAT773_ALERT_2_G | Check long C-C Bond in CIF: C2BA                 | --C3AA            | 2.01  | Ang.  |
| PLAT779_ALERT_4_G | Suspect or Irrelevant (Bond) Angle in CIF .... # |                   | 89    | Check |
|                   | C6BA -O31 -C8                                    | 1.555 1.555 1.555 | 41.00 | Deg.  |
| PLAT779_ALERT_4_G | Suspect or Irrelevant (Bond) Angle in CIF .... # |                   | 137   | Check |
|                   | C8 -C10 -C6BA                                    | 1.555 1.555 1.555 | 32.60 | Deg.  |
| PLAT779_ALERT_4_G | Suspect or Irrelevant (Bond) Angle in CIF .... # |                   | 168   | Check |
|                   | C9AA -C8AA -C3AA                                 | 1.555 1.555 1.555 | 37.10 | Deg.  |
| PLAT779_ALERT_4_G | Suspect or Irrelevant (Bond) Angle in CIF .... # |                   | 191   | Check |
|                   | C8 -C6BA -C0CA                                   | 1.555 1.555 1.555 | 37.30 | Deg.  |
| PLAT779_ALERT_4_G | Suspect or Irrelevant (Bond) Angle in CIF .... # |                   | 193   | Check |
|                   | C9AA -C2BA -C3AA                                 | 1.555 1.555 1.555 | 30.60 | Deg.  |
| PLAT779_ALERT_4_G | Suspect or Irrelevant (Bond) Angle in CIF .... # |                   | 214   | Check |
|                   | C4BA -C3 -C3CA                                   | 1.555 1.555 1.555 | 42.30 | Deg.  |
| PLAT779_ALERT_4_G | Suspect or Irrelevant (Bond) Angle in CIF .... # |                   | 224   | Check |
|                   | C8 -C0CA -C6BA                                   | 1.555 1.555 1.555 | 22.20 | Deg.  |
| PLAT779_ALERT_4_G | Suspect or Irrelevant (Bond) Angle in CIF .... # |                   | 233   | Check |
|                   | C9AA -C3AA -C2BA                                 | 1.555 1.555 1.555 | 40.90 | Deg.  |
| PLAT779_ALERT_4_G | Suspect or Irrelevant (Bond) Angle in CIF .... # |                   | 253   | Check |
|                   | C4AA -C9BA -F13                                  | 1.555 1.555 1.555 | 40.70 | Deg.  |
| PLAT779_ALERT_4_G | Suspect or Irrelevant (Bond) Angle in CIF .... # |                   | 265   | Check |
|                   | C2AA -C1CA -F20                                  | 1.555 1.555 1.555 | 40.90 | Deg.  |
| PLAT789_ALERT_4_G | Atoms with Negative _atom_site_disorder_group #  |                   | 36    | Check |
| PLAT794_ALERT_5_G | Tentative Bond Valency for Cr2                   | (III)             | 3.23  | Info  |
| PLAT860_ALERT_3_G | Number of Least-Squares Restraints .....         |                   | 78    | Note  |
| PLAT933_ALERT_2_G | Number of OMIT Records in Embedded .res File ... |                   | 4     | Note  |

---

0 **ALERT level A** = Most likely a serious problem - resolve or explain  
 1 **ALERT level B** = A potentially serious problem, consider carefully  
 18 **ALERT level C** = Check. Ensure it is not caused by an omission or oversight  
 57 **ALERT level G** = General information/check it is not something unexpected

1 ALERT type 1 CIF construction/syntax error, inconsistent or missing data  
 19 ALERT type 2 Indicator that the structure model may be wrong or deficient  
 4 ALERT type 3 Indicator that the structure quality may be low  
 51 ALERT type 4 Improvement, methodology, query or suggestion  
 1 ALERT type 5 Informative message, check

---

It is advisable to attempt to resolve as many as possible of the alerts in all categories. Often the minor alerts point to easily fixed oversights, errors and omissions in your CIF or refinement strategy, so attention to these fine details can be worthwhile. In order to resolve some of the more serious problems it may be necessary to carry out additional measurements or structure refinements. However, the purpose of your study may justify the reported deviations and the more serious of these should normally be commented upon in the discussion or experimental section of a paper or in the "special\_details" fields of the CIF. checkCIF was carefully designed to identify outliers and unusual parameters, but every test has its limitations and alerts that are not important in a particular case may appear. Conversely, the absence of alerts does not guarantee there are no aspects of the results needing attention. It is up to the individual to critically assess their own results and, if necessary, seek expert advice.

### **Publication of your CIF in IUCr journals**

A basic structural check has been run on your CIF. These basic checks will be run on all CIFs submitted for publication in IUCr journals (*Acta Crystallographica*, *Journal of Applied Crystallography*, *Journal of Synchrotron Radiation*); however, if you intend to submit to *Acta Crystallographica Section C* or *E* or *IUCrData*, you should make sure that full publication checks are run on the final version of your CIF prior to submission.

### **Publication of your CIF in other journals**

Please refer to the *Notes for Authors* of the relevant journal for any special instructions relating to CIF submission.

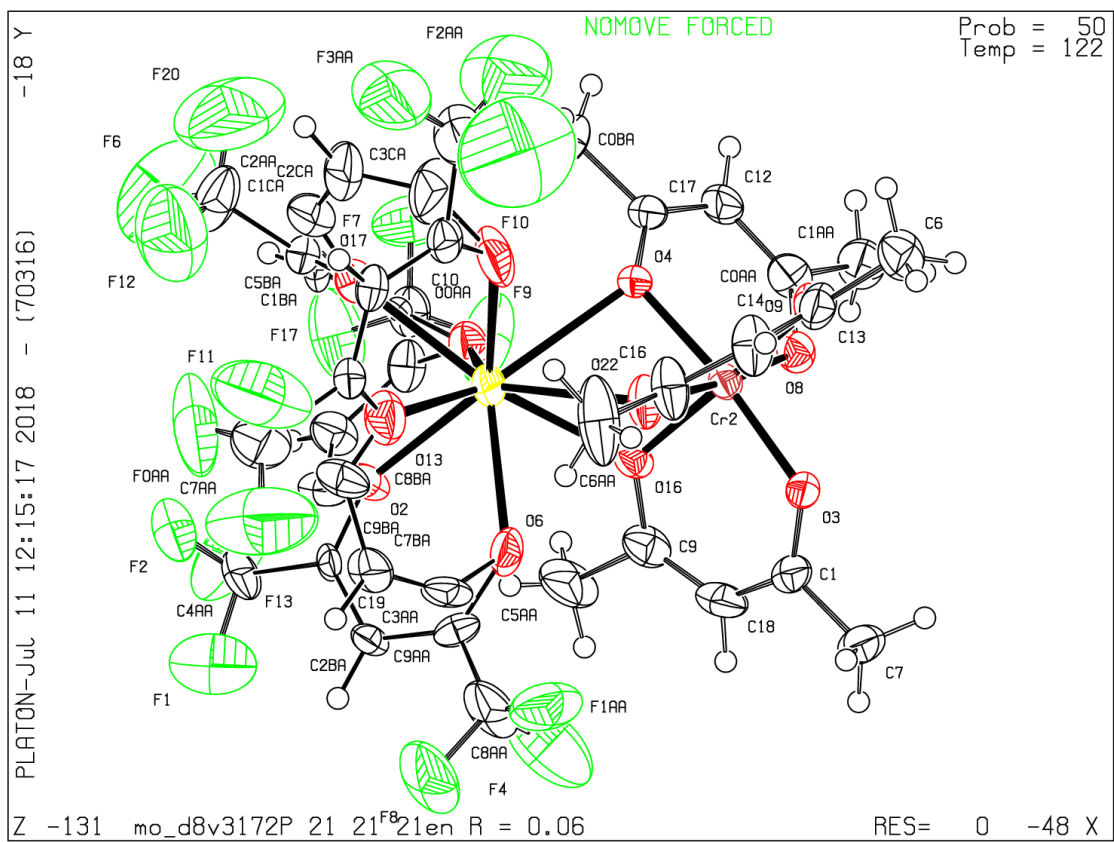

Supplement: s1 [file s1]
