# Supplementary material
Source: MDPI journal article supplement (https://www.mdpi.com/2304-6740/6/3/72)

# checkCIF/PLATON report

You have not supplied any structure factors. As a result the full set of tests cannot be run.

THIS REPORT IS FOR GUIDANCE ONLY. IF USED AS PART OF A REVIEW PROCEDURE FOR PUBLICATION, IT SHOULD NOT REPLACE THE EXPERTISE OF AN EXPERIENCED CRYSTALLOGRAPHIC REFEREE.

No syntax errors found.      CIF dictionary      Interpreting this report

## Datablock: mo\_d8v3322\_0m

---

|                 |                       |                                  |
|-----------------|-----------------------|----------------------------------|
| Bond precision: | C-C = 0.0163 A        | Wavelength=0.71073               |
| Cell:           | a=12.5084(11)         | b=15.8220(13)      c=20.5746(18) |
|                 | alpha=90              | beta=90      gamma=90            |
| Temperature:    | 122 K                 |                                  |
|                 | Calculated            | Reported                         |
| Volume          | 4071.9(6)             | 4071.9(6)                        |
| Space group     | P 21 21 21            | P 21 21 21                       |
| Hall group      | P 2ac 2ab             | P 2ac 2ab                        |
| Moiety formula  | C30 H24 Cr F18 Gd O12 | C30 H24 Cr F16.5 Gd O12, 1.5(F)  |
| Sum formula     | C30 H24 Cr F18 Gd O12 | C30 H24 Cr F18 Gd O12            |
| Mr              | 1127.74               | 1127.74                          |
| Dx,g cm-3       | 1.840                 | 1.840                            |
| Z               | 4                     | 4                                |
| Mu (mm-1)       | 2.019                 | 2.019                            |
| F000            | 2200.0                | 2200.0                           |
| F000'           | 2202.51               |                                  |
| h,k,lmax        | 15,19,25              | 15,19,25                         |
| Nref            | 7787[ 4337]           | 7736                             |
| Tmin,Tmax       | 0.704,0.820           | 0.619,0.745                      |
| Tmin'           | 0.690                 |                                  |

Correction method= # Reported T Limits: Tmin=0.619 Tmax=0.745  
AbsCorr = MULTI-SCAN

Data completeness= 1.78/0.99      Theta(max)= 25.735

R(reflections)= 0.0476( 7430)      wR2(reflections)= 0.1159( 7736)

S = 1.057      Npar= 674

---

The following ALERTS were generated. Each ALERT has the format

**test-name\_ALERT\_alert-type\_alert-level.**

Click on the hyperlinks for more details of the test.

---

**Alert level B**

|                   |                                |        |           |
|-------------------|--------------------------------|--------|-----------|
| PLAT234_ALERT_4_B | Large Hirshfeld Difference F7A | --C0BA | 0.28 Ang. |
| PLAT234_ALERT_4_B | Large Hirshfeld Difference O18 | --C9BA | 0.27 Ang. |

---

**Alert level C**

|                   |                                                     |         |        |
|-------------------|-----------------------------------------------------|---------|--------|
| PLAT090_ALERT_3_C | Poor Data / Parameter Ratio (Zmax > 18) .....       | 6.43    | Note   |
| PLAT213_ALERT_2_C | Atom F2AA has ADP max/min Ratio .....               | 3.3     | prolat |
| PLAT215_ALERT_3_C | Disordered F7 has ADP max/min Ratio .....           | 3.7     | Note   |
| PLAT220_ALERT_2_C | Non-Solvent Resd 1 C Ueq(max)/Ueq(min) Range        | 4.3     | Ratio  |
| PLAT230_ALERT_2_C | Hirshfeld Test Diff for F5AA --C3AA .               | 5.9     | s.u.   |
| PLAT234_ALERT_4_C | Large Hirshfeld Difference F4 --C11                 | 0.18    | Ang.   |
| PLAT234_ALERT_4_C | Large Hirshfeld Difference F4AA --C0BA              | 0.22    | Ang.   |
| PLAT234_ALERT_4_C | Large Hirshfeld Difference F9 --C10                 | 0.24    | Ang.   |
| PLAT234_ALERT_4_C | Large Hirshfeld Difference F20 --C11                | 0.24    | Ang.   |
| PLAT234_ALERT_4_C | Large Hirshfeld Difference O18 --C1BA               | 0.19    | Ang.   |
| PLAT234_ALERT_4_C | Large Hirshfeld Difference O19 --C6BA               | 0.16    | Ang.   |
| PLAT234_ALERT_4_C | Large Hirshfeld Difference C5AA --C8                | 0.22    | Ang.   |
| PLAT234_ALERT_4_C | Large Hirshfeld Difference C11 --C1BA               | 0.23    | Ang.   |
| PLAT241_ALERT_2_C | High 'MainMol' Ueq as Compared to Neighbors of O0AA |         | Check  |
| PLAT342_ALERT_3_C | Low Bond Precision on C-C Bonds .....               | 0.01633 | Ang.   |

---

**Alert level G**

|                   |                                                    |       |              |
|-------------------|----------------------------------------------------|-------|--------------|
| PLAT002_ALERT_2_G | Number of Distance or Angle Restraints on AtSite   | 24    | Note         |
| PLAT003_ALERT_2_G | Number of Uiso or Uij Restrained non-H Atoms ...   | 11    | Report       |
| PLAT012_ALERT_1_G | No _shelx_res_checksum Found in CIF .....          |       | Please Check |
| PLAT042_ALERT_1_G | Calc. and Reported MoietyFormula Strings Differ    |       | Please Check |
| PLAT083_ALERT_2_G | SHELXL Second Parameter in WGHT Unusually Large    | 30.02 | Why ?        |
| PLAT172_ALERT_4_G | The CIF-Embedded .res File Contains DFIX Records   | 2     | Report       |
| PLAT186_ALERT_4_G | The CIF-Embedded .res File Contains ISOR Records   | 5     | Report       |
| PLAT242_ALERT_2_G | Low 'MainMol' Ueq as Compared to Neighbors of C3AA |       | Check        |
| PLAT242_ALERT_2_G | Low 'MainMol' Ueq as Compared to Neighbors of C6   |       | Check        |
| PLAT242_ALERT_2_G | Low 'MainMol' Ueq as Compared to Neighbors of C8   |       | Check        |
| PLAT242_ALERT_2_G | Low 'MainMol' Ueq as Compared to Neighbors of C0BA |       | Check        |
| PLAT242_ALERT_2_G | Low 'MainMol' Ueq as Compared to Neighbors of C10  |       | Check        |
| PLAT242_ALERT_2_G | Low 'MainMol' Ueq as Compared to Neighbors of C11  |       | Check        |
| PLAT300_ALERT_4_G | Atom Site Occupancy of F4AA Constrained at         | 0.5   | Check        |
| PLAT300_ALERT_4_G | Atom Site Occupancy of F7 Constrained at           | 0.5   | Check        |
| PLAT300_ALERT_4_G | Atom Site Occupancy of F4AB Constrained at         | 0.5   | Check        |
| PLAT300_ALERT_4_G | Atom Site Occupancy of F7A Constrained at          | 0.5   | Check        |
| PLAT300_ALERT_4_G | Atom Site Occupancy of F8 Constrained at           | 0.5   | Check        |
| PLAT300_ALERT_4_G | Atom Site Occupancy of F8A Constrained at          | 0.5   | Check        |
| PLAT300_ALERT_4_G | Atom Site Occupancy of C5 Constrained at           | 0.5   | Check        |
| PLAT300_ALERT_4_G | Atom Site Occupancy of C4AA Constrained at         | 0.5   | Check        |
| PLAT300_ALERT_4_G | Atom Site Occupancy of C5AA Constrained at         | 0.5   | Check        |
| PLAT300_ALERT_4_G | Atom Site Occupancy of C9 Constrained at           | 0.5   | Check        |
| PLAT300_ALERT_4_G | Atom Site Occupancy of C9AA Constrained at         | 0.5   | Check        |
| PLAT300_ALERT_4_G | Atom Site Occupancy of C8AA Constrained at         | 0.5   | Check        |
| PLAT300_ALERT_4_G | Atom Site Occupancy of C1BA Constrained at         | 0.5   | Check        |
| PLAT300_ALERT_4_G | Atom Site Occupancy of C2BA Constrained at         | 0.5   | Check        |
| PLAT300_ALERT_4_G | Atom Site Occupancy of C6BA Constrained at         | 0.5   | Check        |
| PLAT300_ALERT_4_G | Atom Site Occupancy of C4BA Constrained at         | 0.5   | Check        |
| PLAT300_ALERT_4_G | Atom Site Occupancy of C7BA Constrained at         | 0.5   | Check        |
| PLAT300_ALERT_4_G | Atom Site Occupancy of C0CA Constrained at         | 0.5   | Check        |
| PLAT300_ALERT_4_G | Atom Site Occupancy of C8BA Constrained at         | 0.5   | Check        |

|                   |                                                  |                |       |       |
|-------------------|--------------------------------------------------|----------------|-------|-------|
| PLAT300_ALERT_4_G | Atom Site Occupancy of C3BA                      | Constrained at | 0.5   | Check |
| PLAT300_ALERT_4_G | Atom Site Occupancy of C20                       | Constrained at | 0.5   | Check |
| PLAT300_ALERT_4_G | Atom Site Occupancy of C5BA                      | Constrained at | 0.5   | Check |
| PLAT300_ALERT_4_G | Atom Site Occupancy of C9BA                      | Constrained at | 0.5   | Check |
| PLAT300_ALERT_4_G | Atom Site Occupancy of C1CA                      | Constrained at | 0.5   | Check |
| PLAT300_ALERT_4_G | Atom Site Occupancy of H4AA                      | Constrained at | 0.5   | Check |
| PLAT300_ALERT_4_G | Atom Site Occupancy of H8AA                      | Constrained at | 0.5   | Check |
| PLAT300_ALERT_4_G | Atom Site Occupancy of H4BA                      | Constrained at | 0.5   | Check |
| PLAT300_ALERT_4_G | Atom Site Occupancy of H7BA                      | Constrained at | 0.5   | Check |
| PLAT300_ALERT_4_G | Atom Site Occupancy of H0CA                      | Constrained at | 0.5   | Check |
| PLAT300_ALERT_4_G | Atom Site Occupancy of H20                       | Constrained at | 0.5   | Check |
| PLAT301_ALERT_3_G | Main Residue Disorder .....(Resd 1 )             |                | 19%   | Note  |
| PLAT380_ALERT_4_G | Incorrectly? Oriented X(sp2)-Methyl Moiety ..... |                | C7AA  | Check |
| PLAT720_ALERT_4_G | Number of Unusual/Non-Standard Labels .....      |                | 48    | Note  |
| PLAT764_ALERT_4_G | Overcomplete CIF Bond List Detected (Rep/Expd) . |                | 1.20  | Ratio |
| PLAT773_ALERT_2_G | Check long C-C Bond in CIF: C4AA --C5BA          |                | 1.99  | Ang.  |
| PLAT773_ALERT_2_G | Check long C-C Bond in CIF: C5AA --C7BA          |                | 1.95  | Ang.  |
| PLAT779_ALERT_4_G | Suspect or Irrelevant (Bond) Angle in CIF .... # |                | 90    | Check |
|                   | C5BA -O2 -C5 1.555 1.555 1.555                   |                | 41.60 | Deg.  |
| PLAT779_ALERT_4_G | Suspect or Irrelevant (Bond) Angle in CIF .... # |                | 95    | Check |
|                   | C5AA -O4 -C8BA 1.555 1.555 1.555                 |                | 43.90 | Deg.  |
| PLAT779_ALERT_4_G | Suspect or Irrelevant (Bond) Angle in CIF .... # |                | 126   | Check |
|                   | C5 -C6 -C5BA 1.555 1.555 1.555                   |                | 33.20 | Deg.  |
| PLAT779_ALERT_4_G | Suspect or Irrelevant (Bond) Angle in CIF .... # |                | 154   | Check |
|                   | C5 -C4AA -C5BA 1.555 1.555 1.555                 |                | 23.00 | Deg.  |
| PLAT779_ALERT_4_G | Suspect or Irrelevant (Bond) Angle in CIF .... # |                | 166   | Check |
|                   | C8BA -C8 -C5AA 1.555 1.555 1.555                 |                | 33.50 | Deg.  |
| PLAT779_ALERT_4_G | Suspect or Irrelevant (Bond) Angle in CIF .... # |                | 176   | Check |
|                   | C2BA -C10 -C1CA 1.555 1.555 1.555                |                | 41.20 | Deg.  |
| PLAT779_ALERT_4_G | Suspect or Irrelevant (Bond) Angle in CIF .... # |                | 186   | Check |
|                   | C8BA -C5AA -C7BA 1.555 1.555 1.555               |                | 41.50 | Deg.  |
| PLAT779_ALERT_4_G | Suspect or Irrelevant (Bond) Angle in CIF .... # |                | 233   | Check |
|                   | C8BA -C7BA -C5AA 1.555 1.555 1.555               |                | 26.50 | Deg.  |
| PLAT779_ALERT_4_G | Suspect or Irrelevant (Bond) Angle in CIF .... # |                | 253   | Check |
|                   | C5 -C5BA -C4AA 1.555 1.555 1.555                 |                | 37.60 | Deg.  |
| PLAT779_ALERT_4_G | Suspect or Irrelevant (Bond) Angle in CIF .... # |                | 261   | Check |
|                   | C11 -C9BA -F3AA 1.555 1.555 1.555                |                | 41.90 | Deg.  |
| PLAT789_ALERT_4_G | Atoms with Negative _atom_site_disorder_group #  |                | 38    | Check |
| PLAT794_ALERT_5_G | Tentative Bond Valency for Cr2 (III) .           |                | 3.22  | Info  |
| PLAT860_ALERT_3_G | Number of Least-Squares Restraints .....         |                | 90    | Note  |

---

0 **ALERT level A** = Most likely a serious problem - resolve or explain  
 2 **ALERT level B** = A potentially serious problem, consider carefully  
 15 **ALERT level C** = Check. Ensure it is not caused by an omission or oversight  
 62 **ALERT level G** = General information/check it is not something unexpected

2 **ALERT type 1** CIF construction/syntax error, inconsistent or missing data  
 15 **ALERT type 2** Indicator that the structure model may be wrong or deficient  
 5 **ALERT type 3** Indicator that the structure quality may be low  
 56 **ALERT type 4** Improvement, methodology, query or suggestion  
 1 **ALERT type 5** Informative message, check

---

It is advisable to attempt to resolve as many as possible of the alerts in all categories. Often the minor alerts point to easily fixed oversights, errors and omissions in your CIF or refinement strategy, so attention to these fine details can be worthwhile. In order to resolve some of the more serious problems it may be necessary to carry out additional measurements or structure refinements. However, the purpose of your study may justify the reported deviations and the more serious of these should normally be commented upon in the discussion or experimental section of a paper or in the "special\_details" fields of the CIF. checkCIF was carefully designed to identify outliers and unusual parameters, but every test has its limitations and alerts that are not important in a particular case may appear. Conversely, the absence of alerts does not guarantee there are no aspects of the results needing attention. It is up to the individual to critically assess their own results and, if necessary, seek expert advice.

### **Publication of your CIF in IUCr journals**

A basic structural check has been run on your CIF. These basic checks will be run on all CIFs submitted for publication in IUCr journals (*Acta Crystallographica*, *Journal of Applied Crystallography*, *Journal of Synchrotron Radiation*); however, if you intend to submit to *Acta Crystallographica Section C* or *E* or *IUCrData*, you should make sure that full publication checks are run on the final version of your CIF prior to submission.

### **Publication of your CIF in other journals**

Please refer to the *Notes for Authors* of the relevant journal for any special instructions relating to CIF submission.

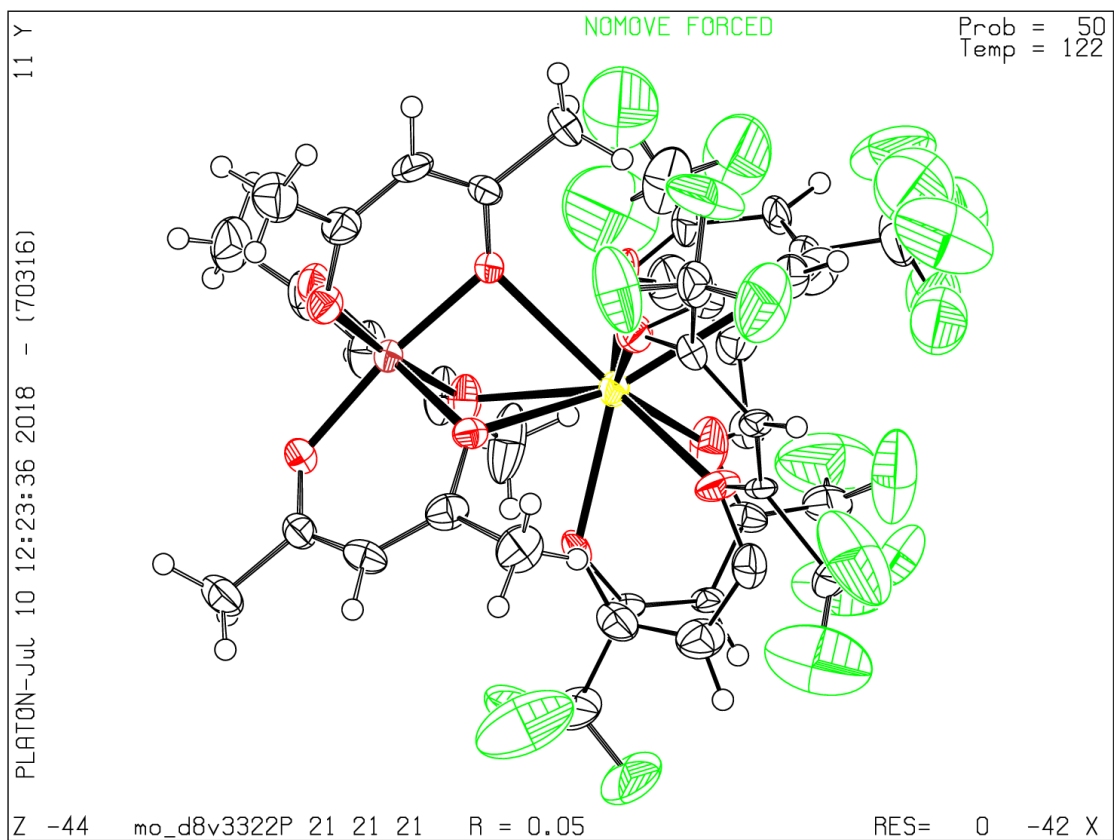

Supplement: s1 [file s1]
